# Supplementary material
Source: HighWire-hosted journal article supplement (https://jitc.bmj.com/content/9/10/e003404)
Supplement: inline-supplementary-material-5 [file inline-supplementary-material-5.pdf]

**supplementary Table 3:** Results of MPLA-sequencing in 9 AT/RTs in which only tumor tissue was available

| sample | sequencing SMARCB1                     | MLPA SMARCB1 pro Exon 2 probes   | SMARCB1 alteration                                                |
|--------|----------------------------------------|----------------------------------|-------------------------------------------------------------------|
| 1      | -                                      | delGNAZ_SMARCB1 + delGNAZ_SNRPD3 | homozygous deletion of SMARCB1                                    |
| 2      | -                                      | delSMARCB1_SNRPD3 + delSMARCB1   | homozygous deletion of SMARCB1                                    |
| 3      |                                        |                                  | homozygous deletion of SMARCB1                                    |
| 4      | c.157C>T p.Arg53* (Exon 2)             | delSMARCB1                       | heterozygous deletion of SMARCB1 and nonsense-mutation            |
| 5      | wild type                              | normal gene dose                 | no mutation detected                                              |
| 6      | c.825_838del p.Asp277Glyfs*79 (Exon 7) | delTBX1_NIPSNAP1                 | heterozygous deletion of SMARCB1 and 14bp deletion (out-of-frame) |
| 7      | c.118C>T p.Arg40* (Exon 2)             | delTBX1_NIPSNAP1                 | heterozygous deletion of SMARCB1 and nonsense-mutation            |
| 8      | c.472C>t p.Arg158* (Exon 4)            | delTBX1_NIPSNAP1                 | heterozygous deletion of SMARCB1 and nonsense mutation            |
| 9      | Ex4 - Ex9 wild type                    | delEx1_Ex3 + delTBX1_NIPSNAP1    | homozygous deletion of Ex1 - Ex3 in SMARCB1 gene                  |
